# Supplementary material
Source: Research Square preprint supplement (doi:10.21203/rs.3.rs-9539932/v1)
Supplement: Supplementary file 1 [file 8b183b604a1f369f50accd25.docx]

| **Variable** | **No. of Missing Values** | **Missing Proportion (%)** |
| --- | --- | --- |
| PSA_B | 14881 | 15.99 |
| ALCO_AMOUNT_B1 | 5271 | 5.67 |
| EGFR | 4105 | 4.41 |
| alco_b1 | 1616 | 1.74 |
| SBP_B | 1488 | 1.60 |
| DBP_B | 1486 | 1.60 |
| HDL_B | 1189 | 1.28 |
| SMOK_B1 | 762 | 0.82 |
| LDL_B | 748 | 0.80 |
| TG_B | 528 | 0.57 |

**Supplementary Table 1. Proportion of missing values in selected baseline variables**

Supplementary Table 2. Confusion Matrices of Ridge Model With and Without PSA Variable (Test Set)

|  | Predicted Negative | Predicted Positive | Total |
| --- | --- | --- | --- |
| Without PSA variable |  |  |  |
| Actual Negative | 14,821 (TN) | 3,614 (FP) | 18,435 |
| Actual Positive | 21 (FN) | 136 (TP) | 157 |
| With PSA variable |  |  |  |
| Actual Negative | 14,837 (TN) | 3,598 (FP) | 18,435 |
| Actual Positive | 16 (FN) | 141 (TP) | 157 |

TN: True Negative; TP: True Positive; FN: False Negative; FN: False Positive

**Supplementary Table 3.** Confusion Matrices of Random Forest Model With and Without PSA Variable (Test Set)

|  | Predicted Negative | Predicted Positive | Total |
| --- | --- | --- | --- |
| Without PSA variable |  |  |  |
| Actual Negative | 14,821 (TN) | 3,614 (FP) | 18,435 |
| Actual Positive | 21 (FN) | 136 (TP) | 157 |
| With PSA variable |  |  |  |
| Actual Negative | 14,837 (TN) | 3,598 (FP) | 18,435 |
| Actual Positive | 16 (FN) | 141 (TP) | 157 |

TN: True Negative; TP: True Positive; FN: False Negative; FN: False Positive

**Supplementary Table 4.** Confusion Matrices of LightGBM Model With and Without PSA Variable (Test Set)

|  | Predicted Negative | Predicted Positive | Total |
| --- | --- | --- | --- |
| Without PSA variable |  |  |  |
| Actual Negative | 14,799 (TN) | 3,636 (FP) | 18,435 |
| Actual Positive | 20 (FN) | 137 (TP) | 157 |
| With PSA variable |  |  |  |
| Actual Negative | 14,819 (TN) | 3,616 (FP) | 18,435 |
| Actual Positive | 15 (FN) | 142 (TP) | 157 |

Supplementary Table 5. Confusion Matrices of XGBoost Model With and Without PSA Variable (Test Set)

|  | Predicted Negative | Predicted Positive | Total |
| --- | --- | --- | --- |
| Without PSA variable |  |  |  |
| Actual Negative | 14,762 (TN) | 3,673 (FP) | 18,435 |
| Actual Positive | 25 (FN) | 132 (TP) | 157 |
| With PSA variable |  |  |  |
| Actual Negative | 14,829 (TN) | 3,606 (FP) | 18,435 |
| Actual Positive | 13 (FN) | 144 (TP) | 157 |

| 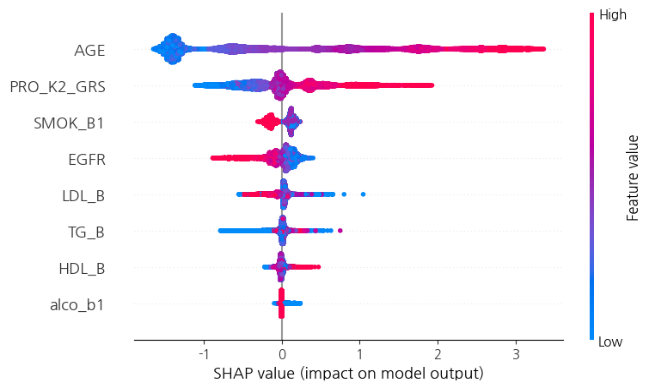 | 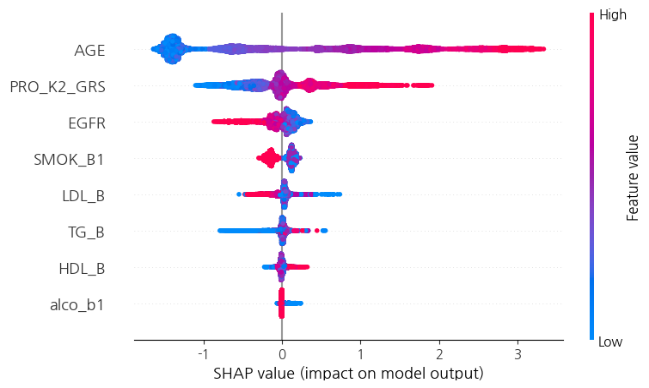 |
| --- | --- |
| Supplementary figure 2. SHAP Summary Plot of the LightGBM Model on the Training Set | Supplementary figure 3. SHAP Summary Plot of the LightGBM Model on the Test Set |
